# Supplementary material
Source: publisher figshare collection journal article supplement (https://karger.figshare.com/ndownloader/files/17786435)
Supplement: Supplementary file 1 [file 17786435]

**HER2 regulates cancer stem cell activities via the Wnt signaling pathway in gastric cancer cells**

by Da Hyun Jung, Yoo Jin Bae, Jie-Hyun Kim, You Keun Shin, Hei-Cheul Jeung

**Supporting Information**

**Table S1** **Baseline characteristics of gastric carcinoma according to HER2 expression**

| **Variables** | **HER (-)**  **(*n* = 15)**  **(*n*, %)** | **HER (+)**  **(*n* = 15)**  **(*n*, %)** | ***P*-value** |
| --- | --- | --- | --- |
| Age (years, mean ± SD) | 65.6 ± 11.4 | 64.9 ± 11.1 | 0.865 |
| Gender |  |  | 1.000 |
| Male | 11 (73.3) | 12 (80.0) |  |
| Female | 4 (26.7) | 3 (20.0) |  |
| WHO classification |  |  | 0.180 |
| Papillary carcinoma | 0 (0.0) | 1 (6.7) |  |
| Well differentiated | 0 (0.0) | 1 (6.7) |  |
| Moderately differentiated | 7 (46.7) | 7 (46.7) |  |
| Poorly differentiated | 7 (46.7) | 3 (20.0) |  |
| Signet ring cell carcinoma | 0 (0.0) | 3 (20.0) |  |
| Mucinous carcinoma | 1 (6.7) | 0 (0.0) |  |
| T stage (AJCC 8th) |  |  | 1.000 |
| T1 | 1 (6.7) | 1 (6.7) |  |
| T2 | 2 (13.3) | 2 (13.3) |  |
| T3 | 4 (26.7) | 4 (26.7) |  |
| T4 | 8 (53.3) | 8 (53.3) |  |
| N stage (AJCC 8th) |  |  | 0.912 |
| N0 | 1 (6.7) | 2 (13.3) |  |
| N1 | 5 (33.3) | 5 (33.3) |  |
| N2 | 3 (20.0) | 2 (13.3) |  |
| N3 | 6 (40.0) | 6 (40.0) |  |

AJCC: American Joint Committee on Cancer; HER2: human epidermal growth factor receptor 2; WHO: World Health Organization
